# Supplementary material
Source: publisher figshare collection journal article supplement (https://acs.figshare.com/ndownloader/files/21057645)
Supplement: Supplementary file 2 [file 21057645]

Archive with 3 entries (3 files):
- info.xml
- ct9b00723_high_quality.mp4
- ct9b00723.pdf
