# Supplementary material
Source: publisher figshare collection journal article supplement (https://acs.figshare.com/ndownloader/files/21057645)
Supplement: Supplementary file 2 [file 21057645 › info.xml]

<presentation>
	<article>
		<title>Evaluating Models of Varying Complexity of Crowded Intrinsically Disordered Protein Solutions Against SAXS</title>
		<doi>10.1021/acs.jctc.9b00723</doi>
		<copyright>American Chemical Society</copyright>
		<narrator>Eric Fagerberg</narrator>
		<contact>Eric Fagerberg</contact>
		<contact-email>eric.fagerberg@teokem.lu.se</contact-email>
		<author-list>
			<author>Marie Skepo&#x308;</author>
		</author-list>
	</article>
	<slides height-width-ratio=".75">
		<slide audio-time="25">
			<subtitle/>
		</slide>
		<slide audio-time="59">
			<subtitle/>
		</slide>
		<slide audio-time="75">
			<subtitle/>
		</slide>
		<slide audio-time="49">
			<subtitle/>
		</slide>
		<slide audio-time="38">
			<subtitle/>
		</slide>
		<slide audio-time="50">
			<subtitle/>
		</slide>
		<slide audio-time="30">
			<subtitle/>
		</slide>
		<slide audio-time="57">
			<subtitle/>
		</slide>
	</slides>
	<audio duration="383"/>
</presentation>
